# Supplementary material
Source: PubMed Central journal article supplement (PMC6859054)

Figure 1d:

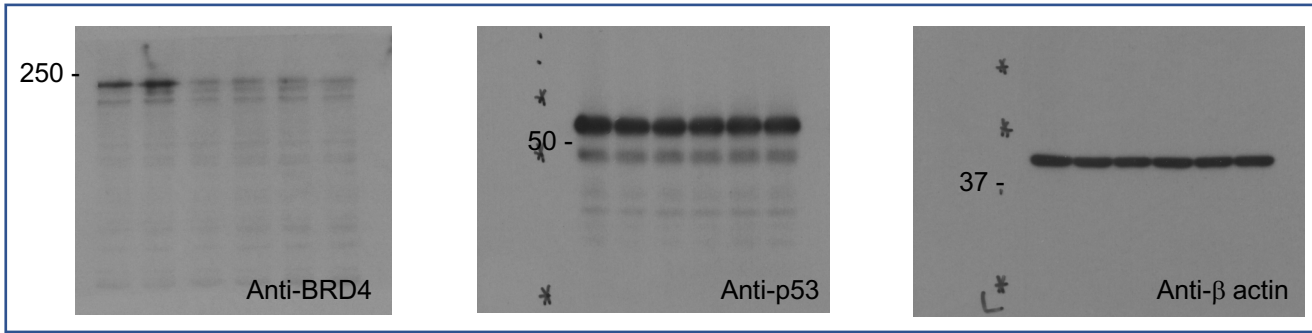

Figure 3a

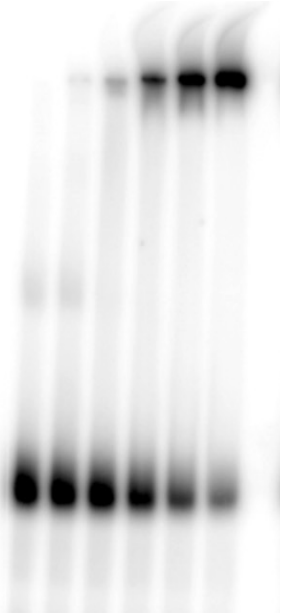

Figure 3b

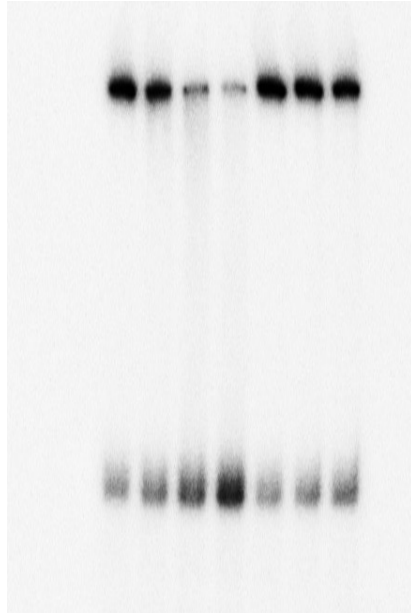

Figure 3d

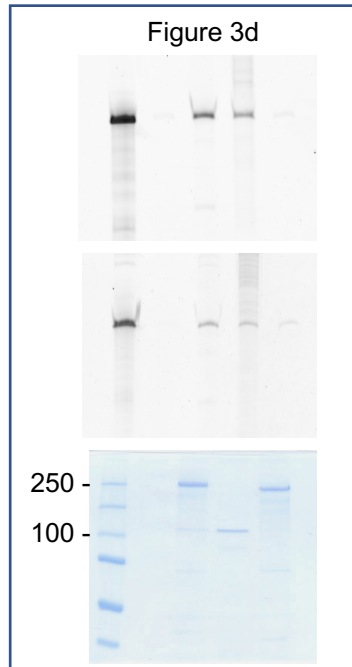

Figure 3e

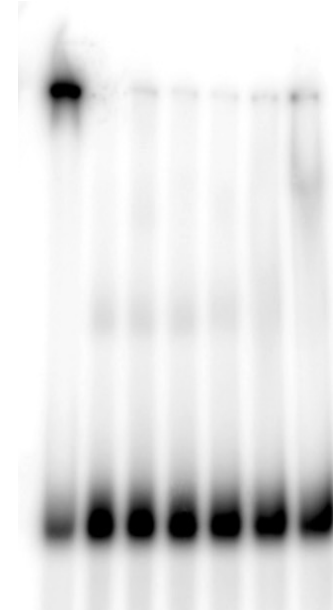

Figure 3f

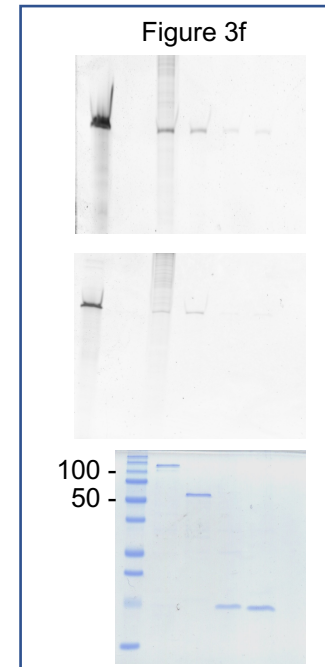

Figure 3g

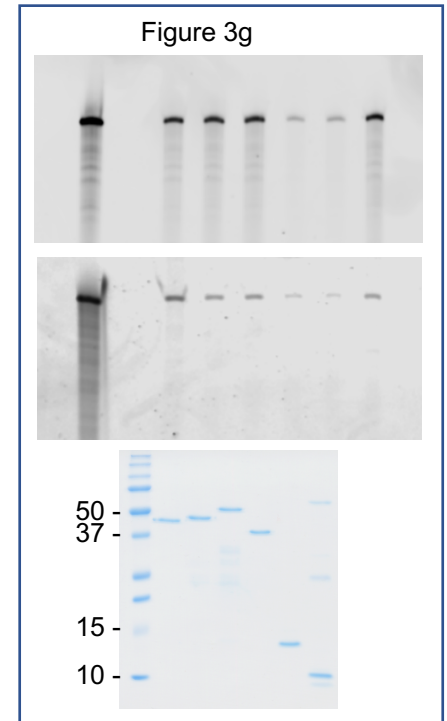

Figure 4a

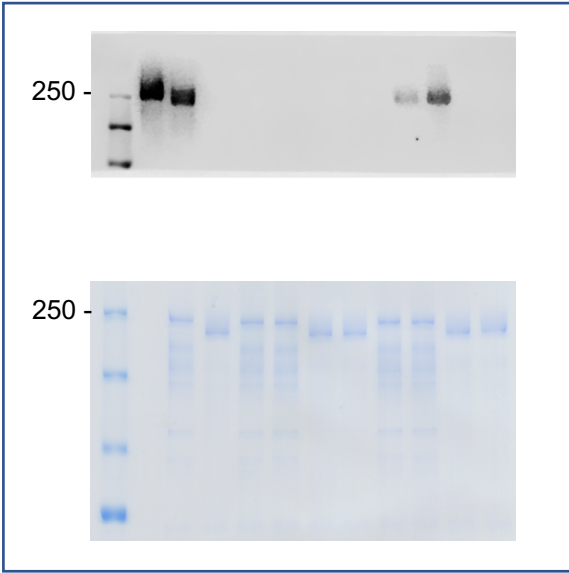

Figure 4b

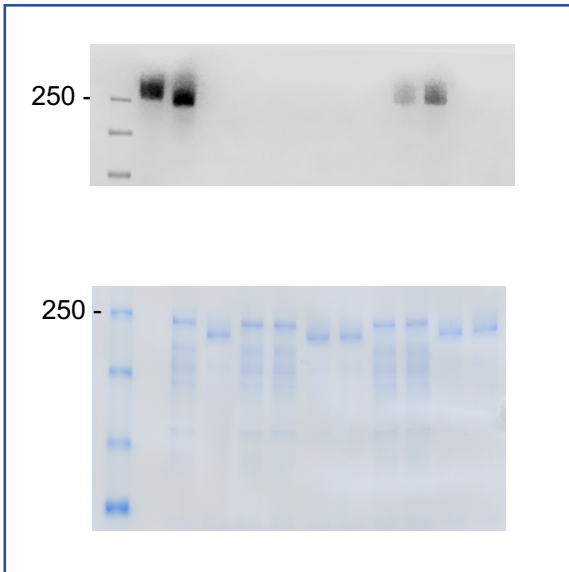

Figure 4c

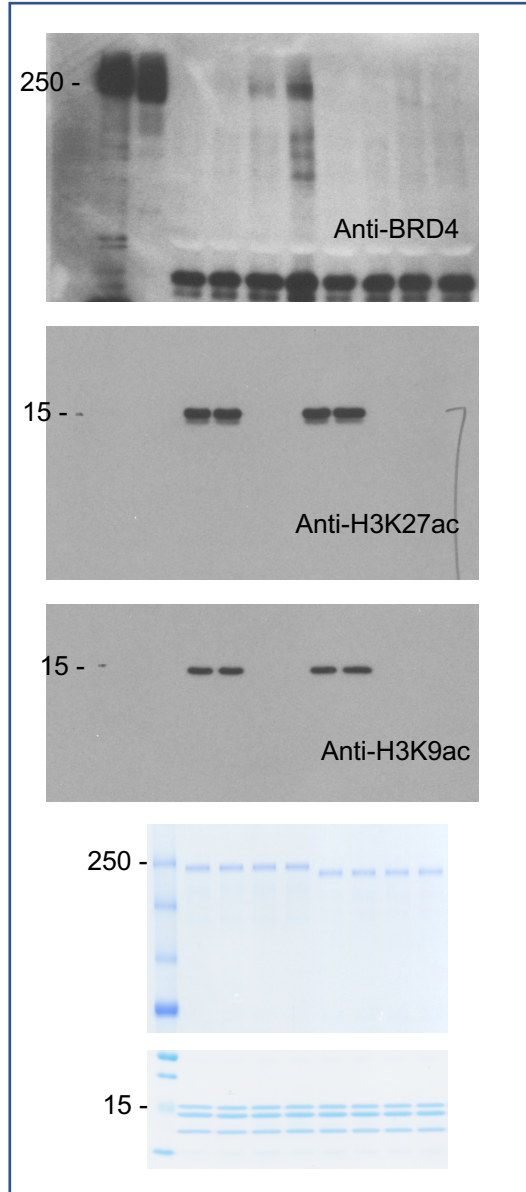

Figure 5b

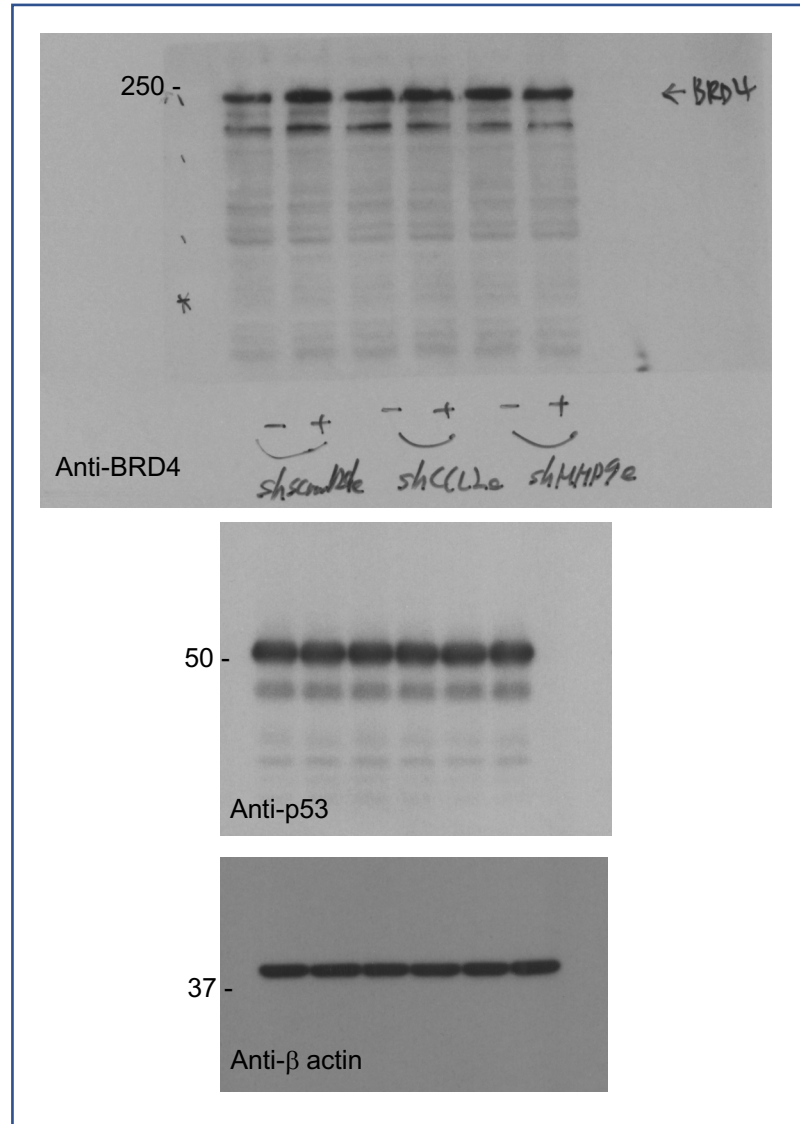

Figure 5d

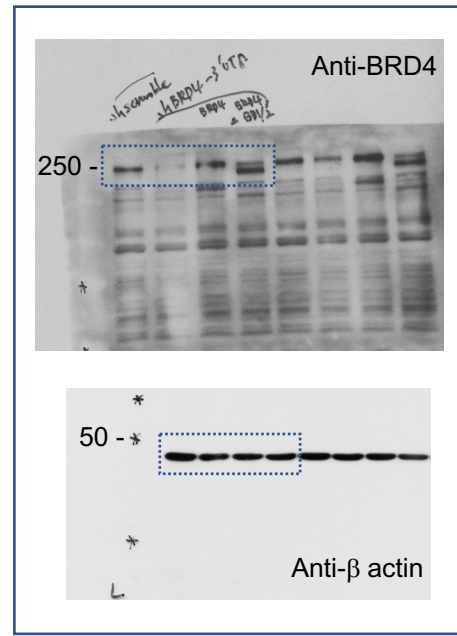

Supplement: NIHMS1056330-supplement-Supplementary_Dataset_1.pdf [file NIHMS1056330-supplement-Supplementary_Dataset_1.pdf]
